# Supplementary material for: New insight into the reaction mechanism of carbon disulfide hydrolysis and the impact of H2S with density functional modeling
Source: Royal Society of Chemistry journal article supplement (doi:10.1039/c8nj06078a), 2019-01-01
Supplement: c8nj06078a1.pdf [file c8nj06078a1.pdf]

**Title:** New insight into the reaction mechanism of carbon disulfide hydrolysis and the impact of H<sub>2</sub>S with density functional modeling

**Authors:** Xin Song, Chi Wang, Khaled A. M. Gasem, Kai Li,\* Xin Sun, Ping Ning,\*

Weibo Gong, Tongtong Wang, Maohong Fan and Lina Sun

**Journal:** New Journal of Chemistry

## Electronic Supplementary Information

### Figure

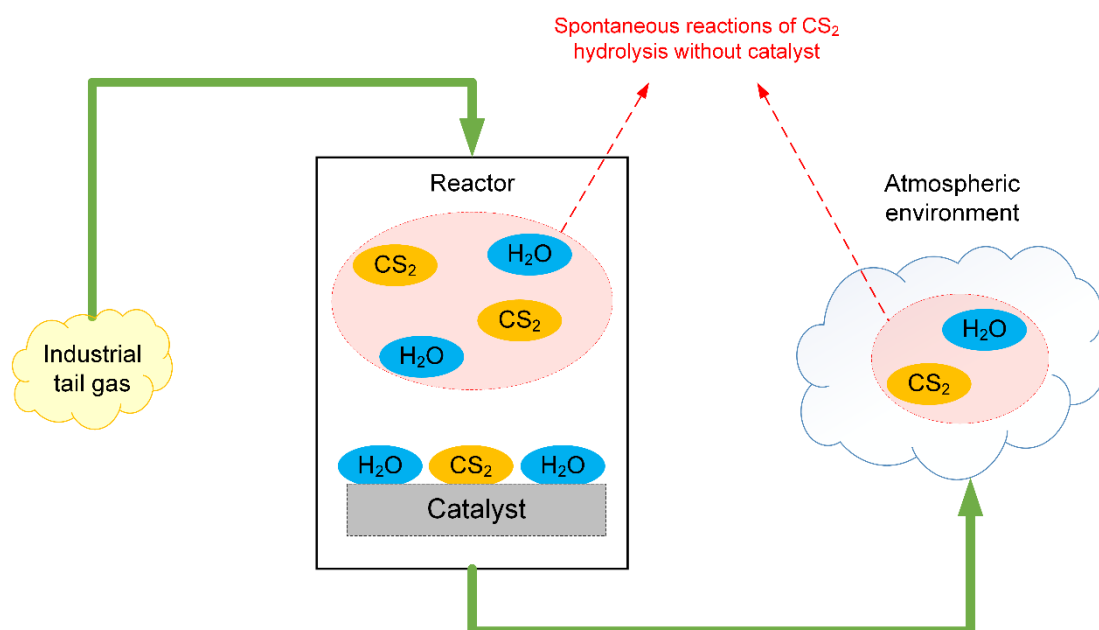

**Fig. S1** Spontaneous reactions of  $\text{CS}_2$  hydrolysis without catalyst

## Tables

**Table S1** Imaginary frequencies of the transition states and bonds corresponding to relative normal vibrations for the two-steps CS<sub>2</sub> hydrolysis

| Transition States | Imaginary frequency<br>(cm <sup>-1</sup> ) | Bonds corresponding to<br>relative normal vibrations |
|-------------------|--------------------------------------------|------------------------------------------------------|
| TS1               | -1352.72                                   | H5-O4                                                |
| TS2               | -1630.53                                   | H6-O4                                                |
| TS3               | -526.82                                    | H6-S2                                                |
| TS4               | -825.36                                    | H6-S2                                                |
| TS5               | -1252.38                                   | H9-O7                                                |
| TS6               | -1646.81                                   | H9-O4                                                |
| TS7               | -759.05                                    | H8-O7                                                |
| TS8               | -1575.38                                   | H6-O4                                                |
| TS9               | -1420.75                                   | H9-O7                                                |

**Table S2** Imaginary frequency of the transition states and bonds corresponding to relative normal vibrations for the one-step CS<sub>2</sub> hydrolysis

| Transition States | Imaginary frequency<br>(cm <sup>-1</sup> ) | Bonds corresponding to<br>relative normal vibrations |
|-------------------|--------------------------------------------|------------------------------------------------------|
| TS1               | -1352.72                                   | H5-O4                                                |
| TS2               | -1630.53                                   | H6-O4                                                |
| TS10              | -985.47                                    | H9-O7                                                |
| TS11              | -764.38                                    | H8-O7                                                |
| TS12              | -1039.72                                   | H9-O7                                                |
| TS13              | -1659.89                                   | H6-O7                                                |
| TS14              | -1208.14                                   | H9-O7                                                |
| TS15              | -921.61                                    | H8-O7                                                |
